# Supplementary material for: Identification of highly expressed genes and efficient core promoters specific to buffalo skeletal muscles
Source: Copernicus journal article supplement (doi:10.5194/aab-68-67-2025), 2025-01-31
Supplement: Supplementary file 1 [file aab-68-67-2025-supplement.zip]

## Sheet: Sheet1
Table S1 Genes with high expression in muscle tissue whereas almost not in adipose tissue in buffaloes based on RNA sequencing.
Transcript_ID	Gene_ID	Symbol	Buffalo adipose_1	Buffalo adipose_2	Buffalo adipose_3	Buffalo muscle_1	Buffalo muscle_2	Buffalo muscle_3	Buffalo adipose_mean	Buffalo muscle_mean	Buffalo muscle_vs_adipose_Log2FoldChange
ENSBTAT00000028269	ENSBTAG00000021218	MYLPF	0	0	0	14.838	14.6445	14.8274	0	14.77	14.77
ENSBTAT00000062950	ENSBTAG00000045757	TNNC1	0	0	0	13.6232	13.6296	13.2386	0	13.4971	13.4971
ENSBTAT00000059227	ENSBTAG00000042235	SNORD30	0	0	0	13.8128	12.9184	13.1655	0	13.2989	13.2989
ENSBTAT00000018492	ENSBTAG00000013921	CKM	0	0	0	13.1432	12.8024	13.23	0	13.0585	13.0585
ENSBTAT00000024444	ENSBTAG00000018369	MYL2	0	0	0	12.53	12.5993	12.222	0	12.4504	12.4504
ENSBTAT00000059669	ENSBTAG00000042677	SNORD59	0	0	0	12.4844	12.0238	12.555	0	12.3544	12.3544
ENSBTAT00000060199	ENSBTAG00000043207	SNORD74	0	0	0	11.6517	11.5199	12.0595	0	11.7437	11.7437
ENSBTAT00000060501	ENSBTAG00000043509	SNORD27	0	0	0	11.0993	11.1134	9.79463	0	10.6691	10.6691
ENSBTAT00000060484	ENSBTAG00000043492	Y_RNA	0	0	0	10.2919	10.4876	10.6921	0	10.4905	10.4905
ENSBTAT00000059498	ENSBTAG00000042506	U5	0	0	0	11.4191	9.30095	10.4501	0	10.39	10.39
ENSBTAT00000063025	ENSBTAG00000047231	TNNI1	0	0	0	10.2026	9.96834	9.99019	0	10.0537	10.0537
ENSBTAT00000051610	ENSBTAG00000037110	U12	0	0	0	9.54768	10.0342	10.283	0	9.95495	9.95495
ENSBTAT00000026002	ENSBTAG00000019521	COX6A2	0	0	0	9.47457	9.46329	9.38494	0	9.44093	9.44093
ENSBTAT00000015348	ENSBTAG00000011548	AMPD1	0	0	0	8.99265	8.72184	8.43288	0	8.71579	8.71579
ENSBTAT00000020229	ENSBTAG00000015204	SMPX	0	0	0	8.05585	8.24681	8.16366	0	8.15544	8.15544
ENSBTAT00000014529	ENSBTAG00000010940	HSPB7	0	0	0	8.29449	7.87881	7.49794	0	7.89041	7.89041
ENSBTAT00000024312	ENSBTAG00000018267	TRIM54	0	0	0	7.88913	7.6764	7.02236	0	7.52929	7.52929
ENSBTAT00000028141	ENSBTAG00000021120	SMYD1	0	0	0	7.60643	7.30719	7.03434	0	7.31599	7.31599
ENSBTAT00000009930	ENSBTAG00000007547	CACNG1	0	0	0	7.16505	6.65543	6.78186	0	6.86745	6.86745
ENSBTAT00000035299	ENSBTAG00000020928	ADPRHL1	0	0	0	6.14668	5.9031	5.76827	0	5.93935	5.93935
ENSBTAT00000065446	ENSBTAG00000046046	LRRC30	0	0	0	5.35552	5.95501	5.89887	0	5.73647	5.73647
ENSBTAT00000016813	ENSBTAG00000012653	CAMK2B	0	0	0	5.55351	5.32796	5.33572	0	5.40573	5.40573
ENSBTAT00000028860	ENSBTAG00000021657	CACNG6	0	0	0	5.52919	5.3949	5.25457	0	5.39288	5.39288
ENSBTAT00000007923	ENSBTAG00000006030	MYOG	0	0	0	3.74493	6.18722	5.88867	0	5.2736	5.2736
ENSBTAT00000063492	ENSBTAG00000046282	VGLL2	0	0	0	5.67498	4.64142	4.34736	0	4.88792	4.88792
ENSBTAT00000002868	ENSBTAG00000002216	MYOD1	0	0	0	3.49255	5.13776	4.92783	0	4.51938	4.51938
ENSBTAT00000021458	ENSBTAG00000016125	KCNA7	0	0	0	4.60561	4.34553	4.39483	0	4.44866	4.44866
ENSBTAT00000037397	ENSBTAG00000026344	MAFA	0	0	0	4.98495	4.06846	4.21768	0	4.4237	4.4237
ENSBTAT00000028986	ENSBTAG00000021745	RAPSN	0	0	0	4.58968	4.1243	4.03097	0	4.24832	4.24832
ENSBTAT00000003800	ENSBTAG00000002924	DUPD1	0	0	0	4.88121	3.97469	3.75284	0	4.20292	4.20292
ENSBTAT00000047281	ENSBTAG00000033269	U1	0	0	0	3.76404	3.53171	5.14768	0	4.14781	4.14781
ENSBTAT00000006039	ENSBTAG00000004602	PITX1	0	0	0	4.51523	4.36158	3.3176	0	4.0648	4.0648
ENSBTAT00000019626	ENSBTAG00000014751	ZIC1	0	0	0	4.24391	3.78225	4.1114	0	4.04585	4.04585
ENSBTAT00000034148	ENSBTAG00000021298	METTL11B	0	0	0	4.09161	3.94878	3.23874	0	3.75971	3.75971
ENSBTAT00000051468	ENSBTAG00000036968	U3	0	0	0	3.30056	3.33686	3.91565	0	3.51769	3.51769
ENSBTAT00000011543	ENSBTAG00000008763	PRR32	0	0	0	3.9614	3.02711	3.34642	0	3.44498	3.44498
ENSBTAT00000028693	ENSBTAG00000021531	PGPEP1L	0	0	0	3.57324	3.28917	3.03387	0	3.29876	3.29876
ENSBTAT00000061173	ENSBTAG00000039696	SHD	0	0	0	3.1447	3.02196	2.67526	0	2.94731	2.94731
ENSBTAT00000000605	ENSBTAG00000000478	LSMEM2	0	0	0	2.65724	2.73134	2.51767	0	2.63541	2.63541
ENSBTAT00000032902	ENSBTAG00000002261	LBX1	0	0	0	2.86784	2.10249	2.25533	0	2.40856	2.40856
ENSBTAT00000000975	ENSBTAG00000024125	RPS27	0	0	0	2.452	2.21689	2.00923	0	2.22604	2.22604
ENSBTAT00000065455	ENSBTAG00000047155	C10orf71	0.0146691	0.0754643	0.0624973	7.93813	7.42121	7.40836	0.0508769	7.58923	7.53836
ENSBTAT00000018977	ENSBTAG00000014284	ALPK2	0.120321	0.0233307	0.0096788	5.24328	4.19576	4.25864	0.0511101	4.5659	4.51479
ENSBTAT00000061306	ENSBTAG00000009703	MYH7	0.0416895	0.0183879	0.110239	12.0946	11.6007	11.5584	0.056772	11.7512	11.6945
ENSBTAT00000063192	ENSBTAG00000046177	IGFN1	0.061508	0.0931003	0.0253109	9.94303	9.4003	9.86968	0.0599731	9.73767	9.6777
ENSBTAT00000035767	ENSBTAG00000005630	VWA7	0	0.139988	0.0508971	2.76205	2.65943	2.53578	0.0636284	2.65242	2.58879
ENSBTAT00000024298	ENSBTAG00000018253	CHRNA1	0.0525944	0.134363	0.0192037	4.70074	3.19346	5.57846	0.0687204	4.49089	4.42217
ENSBTAT00000012099	ENSBTAG00000009182	CLCN1	0.0409543	0	0.169508	6.02363	5.68341	5.89424	0.0701541	5.86709	5.79694
ENSBTAT00000015285	ENSBTAG00000011500	CASQ2	0.164847	0	0.0787969	4.6427	3.38574	3.90728	0.0812145	3.97858	3.89736
ENSBTAT00000008511	ENSBTAG00000014540	PERM1	0.048535	0.0352426	0.183767	6.64982	6.56585	6.98362	0.0891816	6.7331	6.64392
ENSBTAT00000023529	ENSBTAG00000017690	CARNS1	0.0768393	0.157045	0.0503891	4.53847	3.62821	3.3447	0.0947578	3.83713	3.74237
ENSBTAT00000037657	ENSBTAG00000004048	MCHR1	0	0.194309	0.092991	2.43528	2.41012	2.9712	0.0957667	2.60554	2.50977
ENSBTAT00000002787	ENSBTAG00000002151	ASB15	0	0	0.294939	6.35256	6.0022	5.48914	0.098313	5.94797	5.84965
ENSBTAT00000055832	ENSBTAG00000006563	KLHL40	0.0278874	0.0723383	0.19888	8.06244	8.28347	7.10714	0.0997019	7.81769	7.71798
ENSBTAT00000026762	ENSBTAG00000020087	CAMK2A	0.163809	0.0559507	0.112823	7.053	6.66732	6.88679	0.110861	6.86904	6.75818
ENSBTAT00000056227	ENSBTAG00000002964	TXLNB	0.180866	0.0935786	0.0583661	7.39863	7.28392	7.19602	0.110937	7.29286	7.18192
ENSBTAT00000026197	ENSBTAG00000019658	ASB16	0.144011	0.0436374	0.155218	6.23587	5.7343	6.07354	0.114289	6.01457	5.90028
ENSBTAT00000008593	ENSBTAG00000006541	ATP2A1	0.19231	0.121038	0.0438637	11.7277	11.4263	11.5848	0.119071	11.5796	11.4605
ENSBTAT00000012786	ENSBTAG00000009696	ACTN2	0.0493336	0.185714	0.178554	11.0059	10.6963	10.807	0.137867	10.8364	10.6985
ENSBTAT00000001745	ENSBTAG00000001321	IL1B	0.0774838	0.226494	0.162558	2.30243	3.3831	3.36841	0.155512	3.01798	2.86247
ENSBTAT00000002970	ENSBTAG00000002299	SEL1L3	0.0579663	0.281716	0.142164	3.2648	2.0488	2.79511	0.160615	2.7029	2.54229
ENSBTAT00000039242	ENSBTAG00000003512	MYH7B	0.177382	0.156366	0.161067	4.77946	3.88834	3.37619	0.164938	4.01466	3.84973
ENSBTAT00000046515	ENSBTAG00000003741	NEURL1	0.236749	0.0970818	0.174551	7.11334	7.31487	7.03415	0.16946	7.15412	6.98466
ENSBTAT00000007014	ENSBTAG00000005333	MB	0.134343	0.230066	0.144335	14.8884	14.7931	14.4276	0.169582	14.703	14.5334
ENSBTAT00000011677	ENSBTAG00000008868	CAPN3	0.134383	0.183831	0.191776	9.10092	8.87162	8.87042	0.169997	8.94765	8.77766
ENSBTAT00000053888	ENSBTAG00000039708	C9orf172	0.187739	0.16594	0.181049	4.4457	4.10493	3.6969	0.178243	4.08251	3.90427
ENSBTAT00000030030	ENSBTAG00000022244	ACTN3	0.160019	0.234431	0.149008	10.8594	10.102	10.8018	0.181153	10.5877	10.4066
ENSBTAT00000007990	ENSBTAG00000006081	PPM1J	0.29031	0.224519	0.0959911	3.55626	3.55148	3.46592	0.203607	3.52455	3.32095
ENSBTAT00000025740	ENSBTAG00000019327	NRAP	0.280202	0.187727	0.175058	9.1083	8.80633	8.84855	0.214329	8.92106	8.70673
ENSBTAT00000007273	ENSBTAG00000005530	GNMT	0.200385	0.233916	0.214914	3.12764	3.11306	2.8922	0.216405	3.0443	2.82789
ENSBTAT00000029327	ENSBTAG00000021992	MURC	0.150731	0.221084	0.288496	6.04259	6.02193	5.56357	0.220104	5.87603	5.65593
ENSBTAT00000006213	ENSBTAG00000004732	SPTB	0.282033	0.286246	0.219581	6.56829	6.31623	6.36042	0.26262	6.41498	6.15236
