# Supplementary material for: Identification of highly expressed genes and efficient core promoters specific to buffalo skeletal muscles
Source: Copernicus journal article supplement (doi:10.5194/aab-68-67-2025), 2025-01-31
Supplement: Supplementary file 2 [file aab-68-67-2025-supplement.zip]

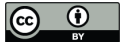

## *Supplement of*

# **Identification of highly expressed genes and efficient core promoters specific to buffalo skeletal muscles**

**Jieping Huang et al.**

*Correspondence to:* Jieping Huang (huangjieping1989@126.com) and Jianghua Shang (shang@163.com)

- aab-68-67-2025-supplement-title-page.pdf
- Figure S1-S2.pdf
- Table S1.xlsx

The copyright of individual parts of the supplement might differ from the article licence.
